# Supplementary material for: Calixarene modified montmorillonite: a novel design for biosensing applications
Source: Royal Society of Chemistry journal article supplement (doi:10.1039/c4ra11818a), 2014-01-01
Supplement: c4ra11818a1.pdf [file c4ra11818a1.pdf]

## SUPPLEMENTARY DATA

### Calixarene Modified Montmorillonite: A Novel Design for Biosensing Applications

Burak Sonmez<sup>a</sup>, Serkan Sayin<sup>b</sup>, Esra Evrim Yalcinkaya<sup>c</sup>, Didem Ag<sup>a</sup>, Huseyin Bekir Yildiz<sup>b</sup>,  
Dilek Odaci Demirkol<sup>a,d</sup>, Suna Timur<sup>a,d</sup>

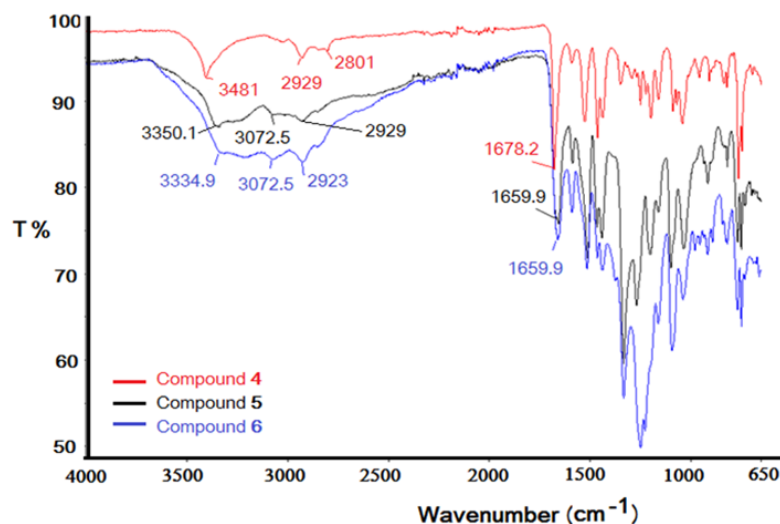

Fig. S1 FTIR (ATR) spectrum of Compounds 4-6.

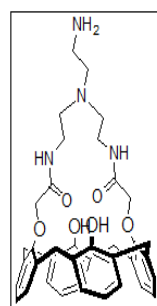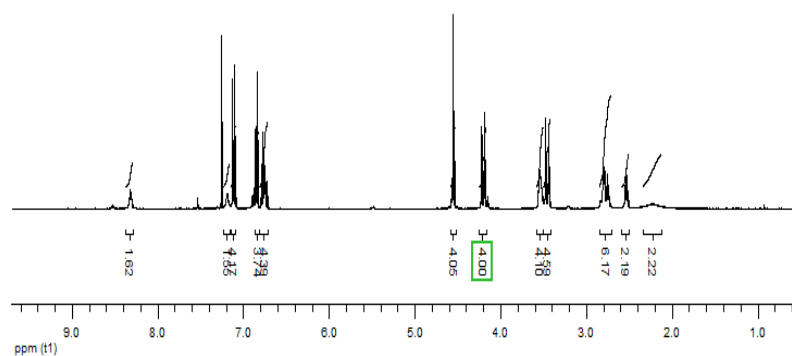

Fig. S2 <sup>1</sup>H-NMR spectrum of Compound 4.

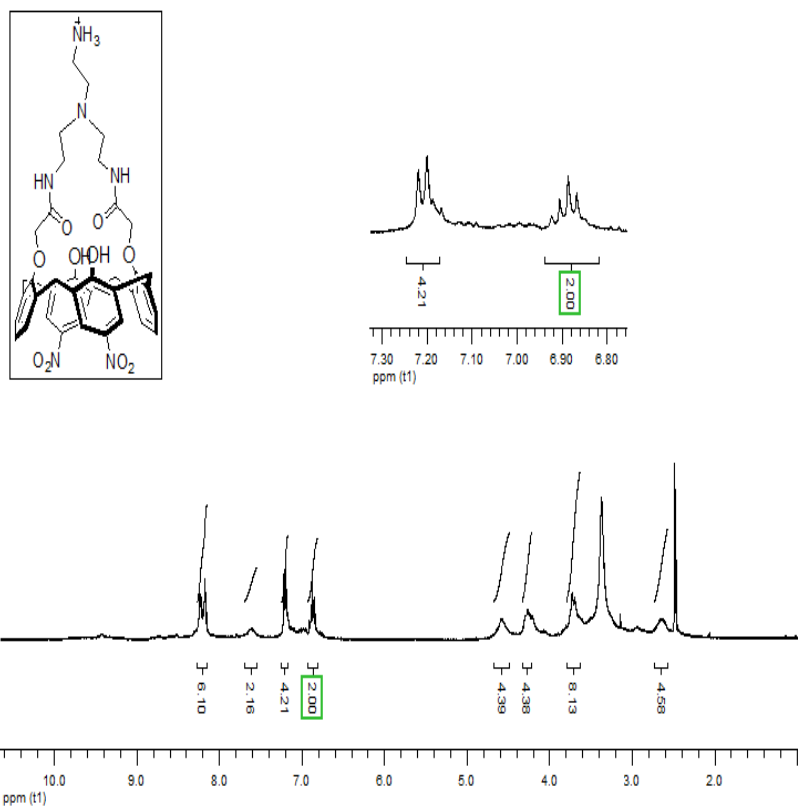

**Fig.S3** <sup>1</sup>H-NMR spectrum of Compound 5.

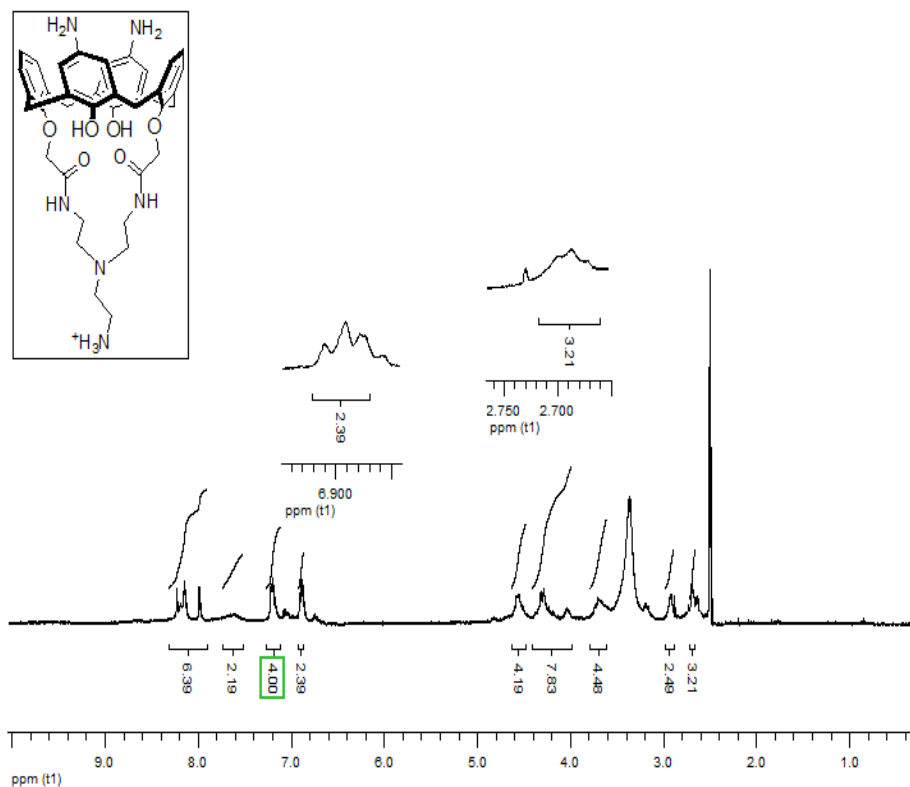

**Fig. S4** <sup>1</sup>H-NMR spectrum of Compound 6.

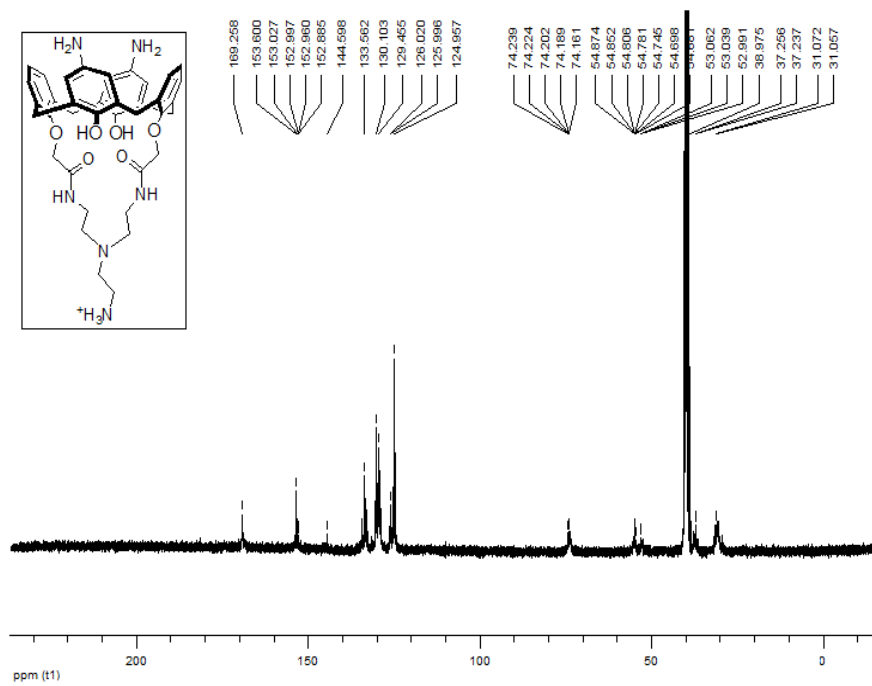

**Fig. S5** <sup>13</sup>C-NMR spectrum of Compound 6.

**TABLES**

**TableS1.** Comparison of various PyOx biosensors reported in literature.

| <b>Electrode configuration</b>        | <b>Immobilization technique</b>     | <b>Detection potential</b> | <b>Linear range for glucose</b> | <b>LOD</b> | <b>Operational stability</b>                   | <b>Reference</b> |
|---------------------------------------|-------------------------------------|----------------------------|---------------------------------|------------|------------------------------------------------|------------------|
| AuNPs–AgCl/PANI/gelatin modified PyOx | Entrapment via nanocomposite matrix | -0.7 V                     | 0.05– 0.75 mM                   | -          | 12% decrease after 6 h                         | 47               |
| Carbon paste modified with MWCNT      | Physicaladsorption                  | +0.9 V                     | 0.2–30 mM                       | -          | 4% decrease after 7 h                          | 39               |
| PyOx–IL–Pt–MnOx/GCE                   | IL coating                          | +0.2 V                     | 0.01–0.1 mM                     | 2.0 μM     | 5 % decrease after 200 measurements            | 48               |
| HKCN/PyOx                             | Cross linking                       | -0.7 V                     | 0.01-1.0 mM                     | -          | No decrease after 81 measurements              | 49               |
| Osmium redox polymer II /PyOx         | Cross linking                       | -0.08 V                    | 0.13-4.0 mM                     | -          | 6 % decrease after 18 h                        | 50               |
| PAMAM/PyOx                            | Cross linking                       | -0.7 V                     | 0.03-0.5 mM                     | 7.45 μM    | No activity lost during 8 h                    | 33               |
| Carbon paste/HRP/PyOx                 | Covalent bounding                   | -0.05 V                    | 0.06-0.65 mM                    | -          | 20% decrease during the first 5 h of operation | 51               |
| Calix-NH <sub>2</sub> /Mt/PyOx        | Cross linking                       | -0.7 V                     | 0.01-0.5 mM                     | 0.50 μM    | 30 % decrease after 72 h                       | This Work        |
